# Supplementary material for: Cystic Echinococcosis: An Impact Assessment of Prevention Programs in Endemic Developing Countries in Africa, Central Asia, and South America
Source: Hindawi journal article supplement (doi:10.1155/2022/8412718), 2022-07-04
Supplement: f1 [file 8412718.f1.docx]

| Table A1. Inclusion/Exclusion Strategy for 34 Journals Within ScienceDirect (2015-2021): Two Included ‘Subject Areas’: ‘Veterinary Science and Veterinary Medicine,’ and ‘Medicine and Dentistry’ | | | | | | | | |
| --- | --- | --- | --- | --- | --- | --- | --- | --- |
| Total Journal Search Results | **1. Full Text and Abstract types** | **2.Excluded**  **Document Types** | **3. Excluded ‘Subject Areas’** | **4.**  **Non-English** | **5. Excluded Study Types** | **6. No Relevance to RQ based upon title, abstract, full text** | **Total Relevant**  **Papers** | **Duplicates**  **7** |
| 01. 84  02. 10  03. 41  04. 4  05. 3  06. 1  07. 12  08. 9  09. 7  10. 30  11. 9  12. 1  13. 0  14. 4  15. 2  16. 0  17. 0  18. 1  19. 2  20. 0  21. 2  22. 16  23. 5  24. 9  25. 12  26. 2  27. 1  28. 1  29. 1  30. 4  31. 2  32. 1  33. 0  34. 0 | No selection option | **13**  **1**  **8**  **1**  **0**  **1**  **1**  **0**  **0**  **2**  **0**  **0**  **0**  **2**  **0**  **0**  **0**  **0**  **0**  **0**  **0**  **4**  **1**  **0**  **0**  **0**  **0**  **0**  **0**  **0**  **0**  **0**  **0**  **0**  **0** | 8 | No selection option | **13**  **1**  **8**  **1**  **0**  **1**  **1**  **1**  **1**  **0**  **0**  **0**  **0**  **2**  **0**  **0**  **0**  **0**  **0**  **0**  **0**  **4**  **1**  **0**  **0**  **0**  **0**  **0**  **0**  **0**  **0**  **0**  **0**  **0**  **0** | **74**  **9**  **33**  **2**  **3**  **0**  **10**  **9**  **7**  **28**  **9**  **1**  **0**  **2**  **0**  **0**  **0**  **1**  **2**  **0**  **2**  **12**  **4**  **9**  **12**  **2**  **1**  **1**  **1**  **4**  **2**  **1**  **0**  **0**  **0** | **1**  **0**  **0**  **1**  **0**  **0**  **0**  **0**  **0**  **0**  **0**  **0**  **0**  **0**  **0**  **0**  **0**  **0**  **0**  **0**  **0**  **0**  **0**  **0**  **0**  **0**  **0**  **0**  **0**  **0**  **0**  **0**  **0**  **0**  **0** | 5/6 PubMed,  6 CAB |
| Total Results: 2 | | | | | | | | |

| **Appendix A.** |
| --- |
